# Supplementary material for: Dynamic Gene Expression in the Human Cerebral Cortex Distinguishes Children from Adults
Source: PubMed Central journal article supplement (PMC3364291; doi:10.1371/journal.pone.0037714), 2012-05-30

## Overrepresented GO Molecular Functions

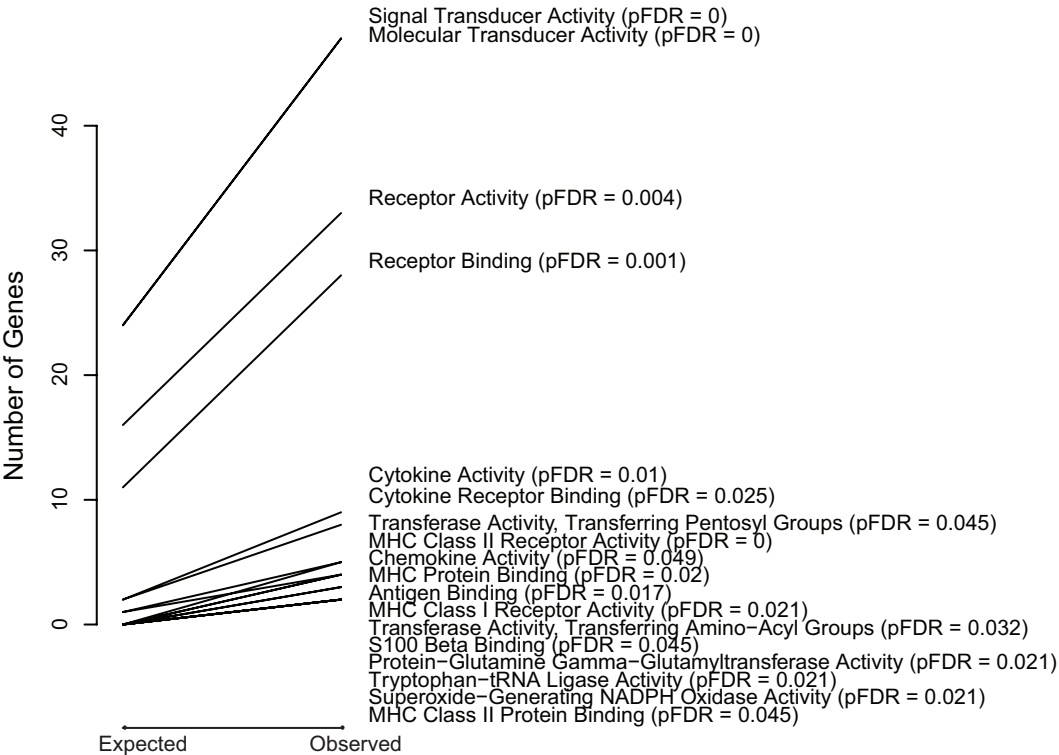

## Overrepresented GO Cellular Components

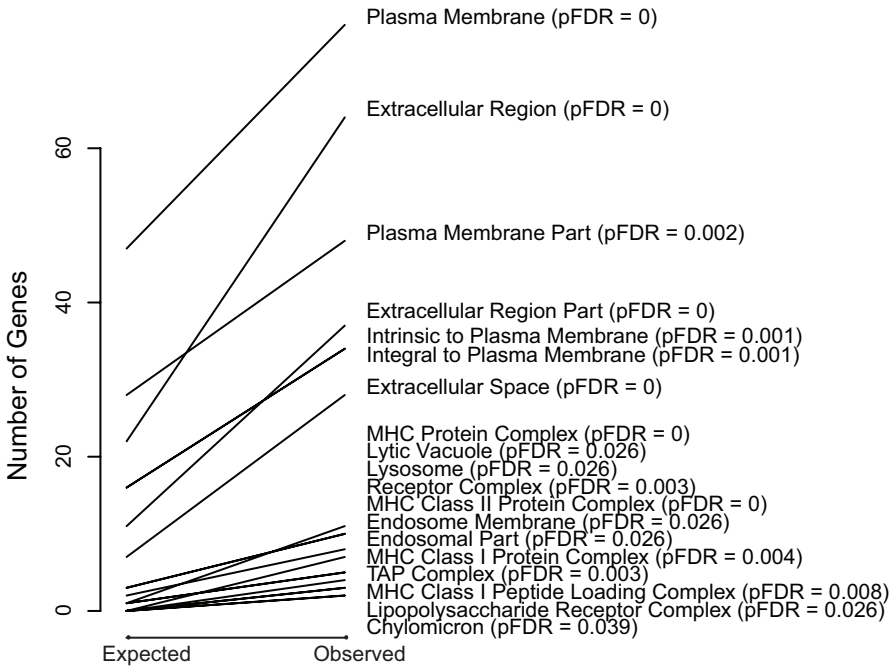

Supplement: pone.0037714.s001.pdf [file pone.0037714.s001.pdf]
