# Supplementary material for: Dynamic Gene Expression in the Human Cerebral Cortex Distinguishes Children from Adults
Source: PubMed Central journal article supplement (PMC3364291; doi:10.1371/journal.pone.0037714), 2012-05-30

Paired SD Younger – SD Older

-0.5 0.0 0.5 1.0 1.5 2.0

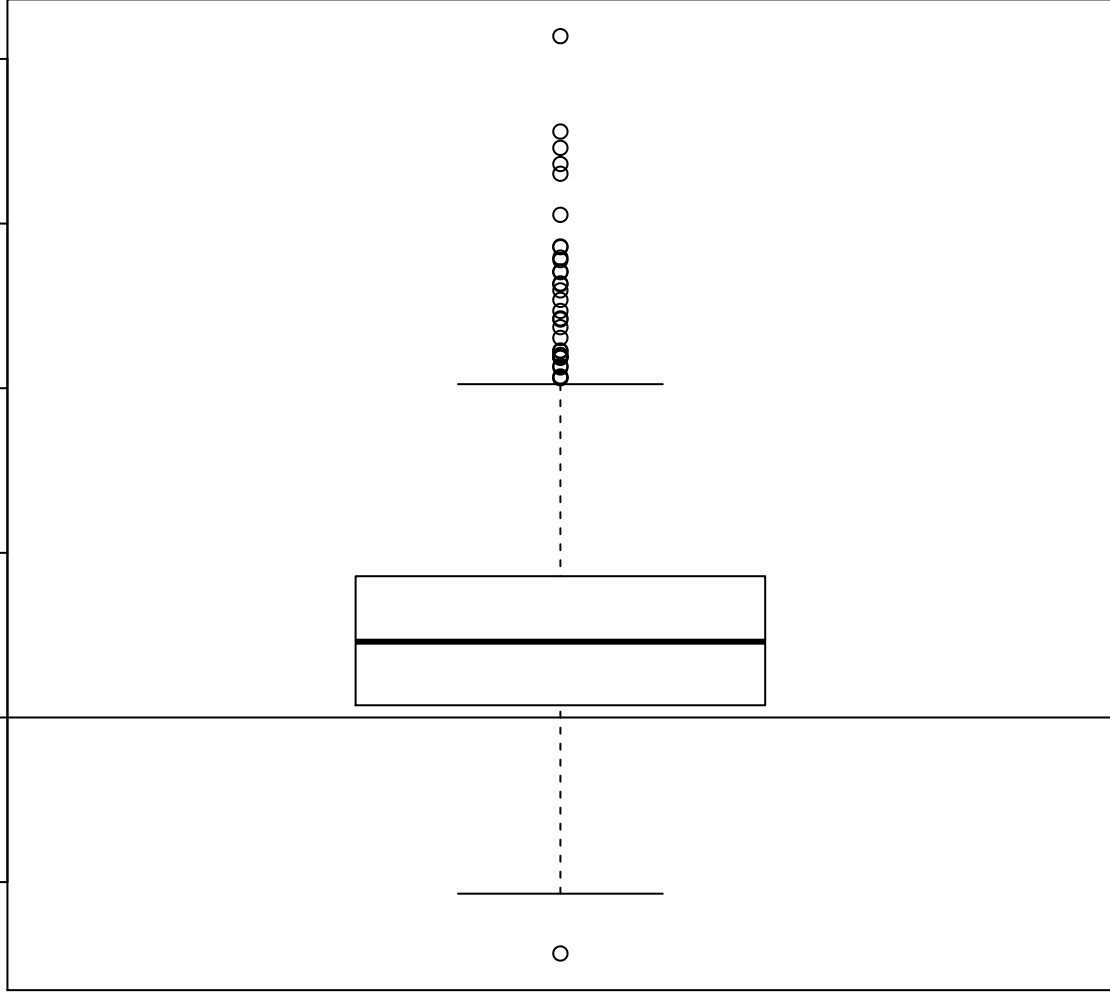

Supplement: pone.0037714.s002.pdf [file pone.0037714.s002.pdf]
